# Supplementary material
Source: PubMed Central journal article supplement (PMC5609485)

## **Supplemental Methods**

### *False Discovery Rate (FDR)*

The tail-area based FDR for a given p-value,  $p$ , is defined as

$$\text{(standard unconditioned) } FDR(p) = \pi_0 F_0(p) / F(p). \quad [1]$$

where  $F_0(p)$  is the cumulative distribution function (cdf) for null SNPs,  $F(p)$  is the cdf for all SNPs and  $\pi_0$  is the *a priori* proportion of null SNPs. In practice the FDR needs to be estimated from the data and a conservative estimate can be obtained by setting  $\pi_0$  to 1. For p-values,  $F_0(p)$  is the cdf for the uniform distribution and  $F(p)$  is estimated by the empirical cdf,  $q = N_p / N$ , where  $N_p$  is the number of SNPs with p-values less than or equal to  $p$ , and  $N$  is the total number of SNPs.

### *Leveraging pleiotropy by conditional FDR*

Conditional FDR exploits the shared polygenic signal between coronary artery disease (CAD) and each secondary trait to increase power for detection of CAD SNPs. Conditional FDR is defined as the posterior probability that a given SNP is null for the first phenotype given that the p-values for both phenotypes are as small or smaller as their observed p-values.

$$\text{Conditional FDR: } FDR(p_1 | p_2) = \pi_0(p_2) p_1 / F(p_1 | p_2), \quad [2]$$

where  $p_1$  is the p-value for the first phenotype,  $p_2$  is the p-value for the second,  $F(p_1 | p_2)$  is the conditional cdf and  $\pi_0(p_2)$  the conditional proportion of null SNPs for the first phenotype given that p-value for the second phenotype is  $p_2$  or smaller. As with FDR, we obtain a conservative estimate of the conditional FDR by setting  $\pi_0$  to 1.  $F(p_1 | p_2)$  is estimated from the data by constructing a two-dimensional grid, with CAD p-value category for columns, and the secondary trait p-value category for rows, and then counting how many SNPs fall into each bin on the grid. The empirical conditional cdf was estimated using the binomial regression model that estimates the probability for falling into a bin conditional on the sum over all bins in one row.

### *Conjunctive FDR*

The conjunctive FDR is defined as follows:

$$FDR_{CAD \& \text{trait2}} = \max(FDR_{CAD | \text{trait2}}, FDR_{\text{trait2} | CAD}). \quad [3]$$

### *FDR calculations for the MetaboChip*

To estimate the conditional and conjunctive FDR, the joint distribution for p-values for the primary trait (CAD) and the secondary trait (e.g. T2D),  $F(p1, p2)$ , needs to be estimated from the observed data. For GWAS data, this is a straightforward process since SNPs on standard GWAS chips can be treated as a random sample of common variants from the human genome and the size of the LD blocks will be unrelated to the effect of the SNPs on the traits of interest. Therefore there is no a priori reason to believe that this estimate of  $F(p1, p2)$  is biased. Here we use the CAD metabochip data rather than standard GWAS chip data. Here the estimation of  $F(p1, p2)$  will be incorrect if we use the whole dataset. The reason for this is that by design since the metabochip follows up previously described cardiometabolic SNPs with fine mapping. This means that there is non-independence between the size of the LD block and statistical significance. Larger blocks of SNPs will be found for non-null SNPs. As such, an unbiased estimate of  $F(p1, p2)$  was obtained from an LD-pruned set of SNPs.

## Online Figure Legends

**Online Figure I. Pleiotropic Enrichment.** Conditional quantile-quantile plot of nominal versus empirical  $-\log_{10}$  p-values in Coronary Artery Disease (CAD) as a function of significance of association with A) body mass index (BMI) B) high density lipoprotein (HDL) C) systolic blood pressure (SBP) and D) triglycerides (TG), at the level of  $-\log_{10}(p) > 0$ ,  $-\log_{10}(p) > 1$ ,  $-\log_{10}(p) > 2$ ,  $-\log_{10}(p) > 3$  corresponding to  $p < 1$ ,  $p < 0.1$ ,  $p < 0.01$ ,  $p < 0.001$ , respectively. Due to the linkage disequilibrium structure on the metabochip, a linkage disequilibrium-pruned set of SNPs was used for the quantile-quantile plots. Input p-values were adjusted for shared subjects, if present. Dotted lines indicate the null-hypothesis.

**Online Figure II. Stratified replication rates plots** showing the average rate of replication ( $p < 0.05$ ) within the CARDIoGRAMplusC4D contributing studies as a function of significance in a secondary trait: (A) C-reactive protein (CRP), (B) type 1 diabetes (T1D), (C) type 2 diabetes (T2D), (D) low density lipoprotein (LDL), (E) high density lipoprotein (HDL), (F) systolic blood pressure (SBP), (G) body mass index (BMI) and (H) triglycerides (TG), at the level of  $-\log_{10}(p) > 0$ ,  $-\log_{10}(p) > 1$ ,  $-\log_{10}(p) > 2$ ,  $-\log_{10}(p) > 3$  corresponding to  $p < 1$ ,  $p < 0.1$ ,  $p < 0.01$ ,  $p < 0.001$ , respectively.

**Online Figure 3 III. Conjunctive FDR Manhattan plot** of  $-\log_{10}$  (conjunctive FDR) for coronary artery disease (CAD) and type 2 diabetes (T2D; CAD&T2D; navy blue), CAD and type 1 diabetes (T1D; CAD&T1D; light green), CAD and low density lipoprotein (LDL; CAD&LDL; aqua). CAD and high density lipoprotein (HDL; CAD&HDL; dark green), CAD and triglycerides (TG; CAD&TG; fuchsia), CAD and body mass index (BMI; CAD&BMI; mustard yellow). CAD and C-reactive protein (CRP; CAD&CRP; royal blue) and CAD and systolic blood pressure (SBP; CAD&SBP; maroon). SNPs with  $-\log_{10}$  (conjunctive FDR)  $> 2.2$  (i.e. overall FDR  $< 0.05$  after Bonferroni correction for eight traits) are shown with large points. A black circle around the large points indicates the most significant SNP in each linkage disequilibrium block and this SNP was

annotated with the closest gene which is listed above the symbols in each locus, except for the HLA region on chromosome 6, which was excluded from the analysis. Details for the novel loci with  $-\log_{10}(\text{conjunctive FDR}) > 2.2$  are given in Supplemental Table 3.

## Online Tables

**Online Table I.** Correlation due to cross-trait sample overlap and corresponding overlap numbers.

| Trait 1 | Trait 2 | Correlation    | Description of overlap                                                                                                                                                                                |
|---------|---------|----------------|-------------------------------------------------------------------------------------------------------------------------------------------------------------------------------------------------------|
| CAD     | T2D     | 0.09 (0.14)    | Cases:<br>26,874 cases unique to T2D<br>55,780 cases unique to CAD;<br>7966 shared cases<br><br>Controls:<br>75,282 controls unique to T2D<br>90,982 controls unique to CAD<br>39,699 shared controls |
| CAD     | T1D     | 0.03 (NA)      | Cases:<br>7514 cases unique to T1D;<br>63,746 cases unique to CAD; no shared cases<br><br>Controls:<br>5703 controls unique to T1D; 127,339 controls unique to CAD, 3342 shared controls              |
| CAD     | LDL     | <0.19 (0.10)   | 188,577 total subjects LDL;<br>194,427 total subjects CAD, up to which 36,432 are shared subjects                                                                                                     |
| CAD     | HDL     | <-0.19 (-0.10) | 188,577 total subjects HDL;<br>194,427 total subjects CAD, up to which 36,432 are shared subjects                                                                                                     |
| CAD     | TG      | <0.19 (0.11)   | 188,577 total subjects HDL;<br>194,427 total subjects CAD, up to which 36,432 are shared subjects                                                                                                     |
| CAD     | BMI     | <0.23 (0.05)   | 123,865 total subjects BMI;<br>194,427 total subjects CAD, up to which 37,131 are shared subjects                                                                                                     |
| CAD     | SBP     | <0.31 (NA)     | 69,395 total subjects SBP;<br>194,427 total subjects CAD, up to which 36,545 are shared subjects                                                                                                      |

Cross-trait correlation of the GWAS test statistics for CAD and each secondary trait calculated using the methods presents in LeBlanc et al. (in prep). Correlation is presented as estimated (observed in data). Where a less than sign, <, is shown, the phenotypic correlation of trait 1 and trait 2 needs to be estimated from epidemiological studies.

**Online Table II.** Anderson Darling test for enrichment.

|      | Logp threshold  |                 |                 |
|------|-----------------|-----------------|-----------------|
|      | >3              | >2              | >1              |
| BMD  | 2.64E-01        | 2.36E-01        | 1.20E-01        |
| T2D  | <b>1.70E-03</b> | 5.69E-02        | 3.47E-01        |
| T1D  | <b>3.58E-04</b> | <b>9.56E-04</b> | 3.81E-01        |
| LDL  | <b>1.87E-29</b> | <b>4.90E-09</b> | <b>7.80E-05</b> |
| HDL  | <b>7.65E-06</b> | 8.60E-03        | 7.47E-02        |
| TG   | <b>1.68E-04</b> | 5.44E-02        | 5.82E-01        |
| BMI  | 1.13E-01        | <b>3.48E-06</b> | <b>2.10E-03</b> |
| CRP  | <b>3.69E-04</b> | 1.60E-02        | 2.23E-01        |
| SBP* | NA              | NA              | NA              |

The bold strata are significant for an overall level of  $\alpha=0.05$  after correction for multiple testing. The set of SNPs (GWAS  $p>0.1$  in the *secondary* trait), i.e., SNPs that are signal depleted in the secondary trait, was used as the comparison set.

\*Note that SBP was excluded from the Anderson Darling test since the effect direction was not available and for technical reasons this made the Anderson Darling test unreliable after correction for sample overlap.

**Online Table III** SNPs that replicate in the WGHS at a nominal p-value of less than 0.05.

| SNP        | Event | P      |
|------------|-------|--------|
| rs4888378  | CHD   | 0.0043 |
| rs6905288  | MI    | 0.0048 |
| rs6905288  | CHD   | 0.0066 |
| rs12801636 | CHD   | 0.0088 |
| rs7296651  | CHD   | 0.014  |
| rs7296651  | MI    | 0.017  |
| rs11066320 | MI    | 0.022  |
| rs867764   | MI    | 0.023  |
| rs12801636 | MI    | 0.030  |
| rs1882961  | CHD   | 0.031  |
| rs10747342 | MI    | 0.032  |
| rs10774613 | MI    | 0.034  |
| rs10774613 | CHD   | 0.036  |
| rs2146238  | MI    | 0.037  |
| rs3179840  | MI    | 0.043  |

MI, myocardial infarction; CHD, coronary heart disease (composed of MI, CHD death, and coronary revascularization)

**Online Table IV. Conjunctonal FDR (<0.05), after controlling for multiple testing across phenotypes**

| snp        | gene            | chr | CAD&T2<br>D     | CAD&T1<br>D     | CAD&L<br>DL     | CAD&HD<br>L     | CAD&TG          | CAD&B<br>MI | CAD&<br>CRP     | CAD&SBP         | Min<br>ConjFD<br>R |
|------------|-----------------|-----|-----------------|-----------------|-----------------|-----------------|-----------------|-------------|-----------------|-----------------|--------------------|
| rs4268379  | <i>SARS</i>     | 1   | 5.07E-02        | 6.98E-01        | <b>8.30E-04</b> | 4.16E-01        | 1.00E+00        | 6.94E-01    | 4.61E-01        | 8.89E-01        | <b>LDL</b>         |
| rs12740374 | <i>CELSR2</i>   | 1   | 3.82E-01        | NA              | <b>3.37E-08</b> | <b>7.40E-09</b> | 2.22E-01        | 5.68E-01    | 3.58E-01        | 1.00E+00        | <b>HDL</b>         |
| rs7515901  | <i>MYBPHL</i>   | 1   | 1.00E+00        | NA              | <b>2.31E-03</b> | 3.70E-01        | 1.00E+00        | 9.68E-01    | 9.97E-01        | 1.00E+00        | <b>LDL</b>         |
| rs10495907 | <i>DYNC2L1I</i> | 2   | 8.91E-01        | 1.00E+00        | <b>3.97E-03</b> | 6.77E-01        | 8.46E-01        | 9.50E-01    | 7.41E-01        | 9.60E-01        | <b>LDL</b>         |
| rs10186133 | <i>IL1F10</i>   | 2   | 9.63E-01        | 9.24E-01        | 4.69E-01        | 8.11E-01        | 5.75E-01        | 1.00E+00    | <b>7.28E-04</b> | 8.89E-01        | <b>CRP</b>         |
| rs934287   | <i>ICAIL</i>    | 2   | 1.00E+00        | 3.63E-01        | <b>1.57E-06</b> | 3.28E-01        | 1.41E-01        | 2.61E-01    | 5.17E-01        | 1.00E+00        | <b>LDL</b>         |
| rs1250255  | <i>FNI</i>      | 2   | 1.00E+00        | 1.00E+00        | <b>5.66E-03</b> | 9.04E-01        | 5.75E-01        | 9.00E-01    | 9.97E-01        | 4.61E-01        | <b>LDL</b>         |
| rs2176042  | <i>BC017935</i> | 2   | <b>3.36E-03</b> | NA              | 4.69E-01        | 7.07E-03        | <b>5.37E-03</b> | 1.26E-01    | 7.90E-01        | 1.99E-01        | <b>T2D</b>         |
| rs7642590  | <i>MAP4</i>     | 3   | 1.00E+00        | NA              | 6.95E-01        | 2.89E-01        | 3.73E-01        | 4.47E-01    | 9.17E-01        | <b>2.26E-03</b> | <b>SBP</b>         |
| rs695238   | <i>TRAIP</i>    | 3   | 9.15E-01        | NA              | 9.29E-01        | 8.35E-03        | 1.00E+00        | 3.43E-01    | <b>5.13E-03</b> | 7.44E-01        | <b>CRP</b>         |
| rs7638389  | <i>BC040632</i> | 3   | <b>5.30E-03</b> | 1.00E+00        | 1.04E-01        | 2.89E-01        | 4.70E-01        | 2.61E-01    | 7.90E-01        | 6.91E-01        | <b>T2D</b>         |
| rs10512987 | <i>PPP2R3A</i>  | 3   | 1.00E+00        | 9.58E-01        | <b>3.73E-03</b> | 1.68E-01        | 7.37E-03        | 3.43E-01    | 3.13E-01        | 8.89E-01        | <b>LDL</b>         |
| rs7356185  | <i>USP53</i>    | 4   | 1.00E+00        | 8.93E-01        | 7.46E-01        | 9.04E-01        | 9.27E-01        | 9.68E-01    | 1.00E+00        | <b>4.18E-03</b> | <b>SBP</b>         |
| rs1508798  | <i>SNORD123</i> | 5   | 1.00E+00        | 9.58E-01        | 5.85E-01        | 2.38E-02        | <b>2.34E-03</b> | 1.00E+00    | 9.17E-01        | 1.00E+00        | <b>TG</b>          |
| rs10477741 | <i>C5orf56</i>  | 5   | 6.96E-01        | NA              | <b>1.03E-03</b> | 5.68E-01        | 1.00E+00        | 1.00E+00    | 9.47E-01        | 8.36E-01        | <b>LDL</b>         |
| rs2814982  | <i>C6orf106</i> | 6   | 9.63E-01        | 1.00E+00        | <b>5.20E-04</b> | <b>3.03E-03</b> | 8.46E-01        | 5.06E-01    | 8.32E-01        | 1.00E+00        | <b>LDL</b>         |
| rs1321309  | <i>CDKN1A</i>   | 6   | 8.11E-01        | NA              | 4.69E-01        | 7.38E-01        | <b>1.86E-03</b> | 1.00E+00    | 5.74E-01        | 8.89E-01        | <b>TG</b>          |
| rs6905288  | <i>VEGFA</i>    | 6   | 3.44E-01        | 1.00E+00        | 6.41E-01        | <b>2.56E-03</b> | <b>3.46E-03</b> | 8.61E-01    | 9.97E-01        | 1.51E-02        | <b>HDL</b>         |
| rs1564348  | <i>SLC22A1</i>  | 6   | 8.56E-01        | 1.00E+00        | <b>5.66E-03</b> | 5.15E-01        | 1.26E-02        | 9.68E-01    | 6.32E-01        | 7.44E-01        | <b>LDL</b>         |
| rs9365233  | <i>MAP3K4</i>   | 6   | 1.00E+00        | 1.00E+00        | <b>5.78E-03</b> | 1.00E+00        | 7.33E-01        | 5.06E-01    | 1.00E+00        | 6.34E-01        | <b>LDL</b>         |
| rs2237659  | <i>COG5</i>     | 7   | 6.96E-01        | 1.00E+00        | 2.60E-02        | 7.38E-01        | <b>2.66E-03</b> | 8.61E-01    | 5.17E-01        | 8.89E-01        | <b>TG</b>          |
| rs6997340  | <i>NAT2</i>     | 8   | 6.35E-01        | 9.58E-01        | <b>3.97E-03</b> | 6.22E-01        | 1.20E-02        | 9.68E-01    | 7.41E-01        | 1.00E+00        | <b>LDL</b>         |
| rs11204085 | <i>SLC18A1</i>  | 8   | 7.56E-01        | NA              | 9.29E-01        | <b>9.24E-04</b> | <b>1.50E-03</b> | 1.00E+00    | 9.17E-01        | 1.00E+00        | <b>HDL</b>         |
| rs343494   | <i>RANBP6</i>   | 9   | 1.00E+00        | <b>5.94E-03</b> | 1.00E+00        | 6.22E-01        | 1.00E+00        | 1.00E+00    | 9.97E-01        | 7.44E-01        | <b>T1D</b>         |
| rs7902355  | <i>TSPAN14</i>  | 10  | 9.63E-01        | 1.00E+00        | 3.17E-01        | <b>5.80E-03</b> | 8.46E-01        | 1.00E+00    | 9.97E-01        | 5.75E-01        | <b>HDL</b>         |
| rs7926335  | <i>PLEKHA7</i>  | 11  | 9.63E-01        | NA              | 9.29E-01        | 3.70E-01        | 1.00E+00        | 9.39E-01    | 9.97E-01        | <b>7.17E-04</b> | <b>SBP</b>         |



|            |                 |    |                 |                 |                 |                 |                 |          |                 |                 |            |
|------------|-----------------|----|-----------------|-----------------|-----------------|-----------------|-----------------|----------|-----------------|-----------------|------------|
| rs12801636 | <i>PCNXL3</i>   | 11 | 4.70E-01        | 1.00E+00        | 3.17E-01        | <b>6.50E-04</b> | <b>1.02E-03</b> | 9.26E-01 | 4.40E-02        | 6.43E-02        | <b>HDL</b> |
| rs644740   | <i>OVOL1</i>    | 11 | 6.35E-01        | 8.93E-01        | 1.38E-02        | 1.15E-02        | 8.46E-02        | 1.00E+00 | 7.90E-01        | <b>2.26E-03</b> | <b>SBP</b> |
| rs7933887  | <i>ST3GAL4</i>  | 11 | 1.00E+00        | NA              | 1.04E-01        | <b>4.69E-03</b> | 3.73E-01        | 1.00E+00 | 1.00E+00        | 7.91E-01        | <b>HDL</b> |
| rs4149033  | <i>SLCO1B1</i>  | 12 | 1.00E+00        | 1.00E+00        | 6.41E-01        | 1.00E+00        | <b>3.98E-03</b> | 9.26E-01 | 1.00E+00        | 8.89E-01        | <b>TG</b>  |
| rs2681472  | <i>ATP2B1</i>   | 12 | 8.11E-01        | 1.00E+00        | 1.00E+0<br>0    | 1.00E+00        | 4.70E-01        | 1.00E+00 | 7.90E-01        | <b>3.40E-03</b> | <b>SBP</b> |
| rs1056618  | <i>AJ276555</i> | 12 | 1.00E+00        | NA              | <b>5.78E-03</b> | 7.38E-01        | 9.27E-01        | 5.68E-01 | 8.32E-01        | 1.00E+00        | <b>LDL</b> |
| rs7398833  | <i>CUX2</i>     | 12 | 9.15E-01        | <b>1.85E-04</b> | <b>1.94E-03</b> | 3.70E-01        | <b>3.25E-03</b> | 8.11E-01 | 2.02E-01        | <b>2.29E-04</b> | <b>TG</b>  |
| rs11066320 | <i>PTPN11</i>   | 12 | 9.63E-01        | <b>4.05E-06</b> | <b>1.28E-05</b> | <b>8.40E-05</b> | 3.73E-01        | 1.88E-02 | 9.17E-01        | <b>5.55E-06</b> | <b>T1D</b> |
| rs7315519  | <i>RPH3A</i>    | 12 | 8.91E-01        | <b>4.86E-04</b> | <b>2.99E-03</b> | <b>3.59E-03</b> | 9.27E-01        | 1.26E-01 | 1.00E+00        | 1.21E-01        | <b>T1D</b> |
| rs692902   | <i>SPPL3</i>    | 12 | 3.19E-02        | 9.24E-01        | 2.75E-01        | 2.89E-02        | 7.85E-01        | 1.00E+00 | <b>4.77E-03</b> | 8.89E-01        | <b>CRP</b> |
| rs2708081  | <i>OASL</i>     | 12 | 1.02E-01        | 3.10E-01        | <b>6.70E-04</b> | 1.94E-01        | 8.46E-01        | 9.26E-01 | <b>3.41E-05</b> | 8.89E-01        | <b>CRP</b> |
| rs825461   | <i>ZNF664</i>   | 12 | <b>4.29E-03</b> | 1.00E+00        | 9.29E-01        | <b>3.59E-03</b> | 1.65E-01        | 5.68E-01 | 1.00E+00        | 3.60E-01        | <b>T2D</b> |
| rs11057830 | <i>SCARB1</i>   | 12 | 9.36E-01        | NA              | <b>3.49E-04</b> | 1.95E-02        | <b>2.69E-03</b> | 9.26E-01 | 9.97E-01        | 4.09E-01        | <b>LDL</b> |
| rs4932370  | <i>FURIN</i>    | 15 | 3.82E-01        | 9.24E-01        | 4.69E-01        | 3.28E-01        | 3.73E-01        | 9.50E-01 | 7.41E-01        | <b>7.93E-05</b> | <b>SBP</b> |
| rs2072142  | <i>DHX38</i>    | 16 | 9.15E-01        | NA              | <b>1.93E-03</b> | 6.22E-01        | 7.85E-01        | 8.02E-02 | 1.00E+00        | NA              | <b>LDL</b> |
| rs9927309  | <i>CTRB2</i>    | 16 | <b>5.30E-03</b> | <b>8.50E-04</b> | 9.29E-01        | 4.64E-01        | 1.00E+00        | 9.00E-01 | 1.00E+00        | 7.91E-01        | <b>T2D</b> |
| rs1838105  | <i>GOSR2</i>    | 17 | 1.00E+00        | NA              | 1.48E-01        | <b>5.97E-03</b> | 6.29E-01        | 8.11E-01 | 1.00E+00        | 8.76E-02        | <b>HDL</b> |
| rs12940887 | <i>ZNF652</i>   | 17 | 9.36E-01        | NA              | 7.46E-01        | 8.89E-02        | 1.92E-02        | 8.61E-01 | 9.97E-01        | <b>5.15E-03</b> | <b>SBP</b> |
| rs2812     | <i>PECAMI</i>   | 17 | 9.36E-01        | NA              | 6.41E-01        | 1.24E-01        | 9.27E-01        | 8.61E-01 | 7.41E-01        | <b>3.63E-03</b> | <b>SBP</b> |
| rs13465    | <i>ILF3</i>     | 19 | 9.63E-01        | 4.89E-01        | <b>1.62E-03</b> | 2.22E-01        | 8.46E-01        | 9.68E-01 | 1.00E+00        | 7.44E-01        | <b>LDL</b> |
| rs12052058 | <i>SMARCA4</i>  | 19 | 8.91E-01        | 8.14E-01        | <b>7.34E-06</b> | 7.38E-01        | 1.00E+00        | 8.11E-01 | 5.74E-01        | 1.00E+00        | <b>LDL</b> |
| rs892115   | <i>SPC24</i>    | 19 | 9.63E-01        | 1.19E-01        | <b>4.75E-03</b> | 9.04E-01        | 1.00E+00        | 9.00E-01 | 6.88E-01        | 7.44E-01        | <b>LDL</b> |
| rs17616661 | <i>KANK2</i>    | 19 | 1.00E+00        | 6.98E-01        | <b>1.57E-03</b> | <b>1.55E-03</b> | 3.29E-01        | 9.50E-01 | 5.17E-01        | 9.60E-01        | <b>HDL</b> |
| rs2241718  | <i>CYP2F1</i>   | 19 | 9.63E-01        | NA              | <b>2.99E-03</b> | 9.04E-01        | 5.75E-01        | 1.00E+00 | 9.97E-01        | NA              | <b>LDL</b> |
| rs1415771  | <i>EDEM2</i>    | 20 | 1.00E+00        | 1.02E-01        | 5.89E-02        | <b>4.25E-03</b> | 1.00E+00        | 8.61E-01 | 1.00E+00        | 9.60E-01        | <b>HDL</b> |
| rs3827066  | <i>ZNF335</i>   | 20 | 1.00E+00        | NA              | 2.75E-01        | <b>1.55E-03</b> | 7.00E-03        | 9.68E-01 | 5.74E-01        | 1.00E+00        | <b>HDL</b> |
| rs4822458  | <i>DDT</i>      | 22 | 1.00E+00        | 8.58E-01        | 1.00E+0<br>0    | 9.04E-01        | <b>5.76E-03</b> | 9.50E-01 | 8.66E-01        | 1.00E+00        | <b>TG</b>  |

Independent ( $r^2 < 0.2$ ) of SNP(s) with a conjunctive FDR (conjFDR)  $< 0.05$  (after Bonferroni correction for 8 traits) in Coronary Artery Disease (CAD) given the significance level in the associated phenotype. We defined the most significant CAD SNP in each LD block based on the minimum conjunctive FDR for each associated phenotype. The most significant SNPs in each gene of the LD block are listed along with the associated

phenotype that provided the signal. Coronary artery disease (CAD), low density lipoprotein (LDL) cholesterol, high density lipoprotein (HDL) cholesterol, triglycerides (TG), type 2 diabetes (T2D), C-reactive protein (CRP), body mass index (BMI), systolic blood pressure (SBP), type 1 diabetes (T1D), chromosome number (Chr). Conjunctive FDR values  $< 0.05$ , after adjusting for multiple testing across phenotypes are in bold. The most significant phenotype association per gene is shown (min conjFDR). NA indicates that a given SNP was not available for a given trait.

**Online Table V. Signed z-scores for the SNPs presented in Supplemental Table 3.**

| snp        | gene            | chr | CAD z-score | BMI z-score | T2D z_score | LDL z-score | HDL z-score | TG z-score | CRP z-score | Min conjFDR     | Trait      |
|------------|-----------------|-----|-------------|-------------|-------------|-------------|-------------|------------|-------------|-----------------|------------|
| rs4268379  | <i>SARS</i>     | 1   | -4.95       | 1.64        | 3.57        | -12.00      | 1.85        | -0.42      | 2.09        | <b>8.30E-04</b> | <b>LDL</b> |
| rs12740374 | <i>CELSR2</i>   | 1   | 8.70        | -1.91       | -2.22       | 36.59       | -8.37       | 2.75       | -2.24       | <b>7.40E-09</b> | <b>HDL</b> |
| rs7515901  | <i>MYBPHL</i>   | 1   | 4.48        | -0.57       | -0.06       | 9.40        | -1.98       | 0.15       | 0.43        | <b>2.31E-03</b> | <b>LDL</b> |
| rs10495907 | <i>DYNC2L1I</i> | 2   | -4.22       | -0.98       | -1.29       | -7.81       | 1.21        | -0.96      | -1.51       | <b>3.97E-03</b> | <b>LDL</b> |
| rs10186133 | <i>IL1F10</i>   | 2   | 4.24        | -0.10       | -0.46       | 1.84        | 0.41        | 1.59       | -5.98       | <b>7.28E-04</b> | <b>CRP</b> |
| rs934287   | <i>ICAIL</i>    | 2   | 5.84        | -2.49       | 0.08        | -5.46       | -2.20       | -2.48      | -1.93       | <b>1.57E-06</b> | <b>LDL</b> |
| rs1250255  | <i>FNI</i>      | 2   | 3.44        | -1.22       | 0.50        | -4.75       | 0.24        | -1.25      | 0.47        | <b>5.66E-03</b> | <b>LDL</b> |
| rs2176042  | <i>BC017935</i> | 2   | -4.33       | 2.72        | -6.59       | -1.84       | 8.47        | -7.43      | -1.38       | <b>3.36E-03</b> | <b>T2D</b> |
| rs7642590  | <i>MAP4</i>     | 3   | -3.96       | 2.01        | -0.75       | -1.36       | 2.11        | -2.11      | -0.90       | <b>2.26E-03</b> | <b>SBP</b> |
| rs695238   | <i>TRAIP</i>    | 3   | -4.04       | -2.43       | -1.19       | 0.32        | 4.38        | -0.12      | -4.02       | <b>5.13E-03</b> | <b>CRP</b> |
| rs7638389  | <i>BC040632</i> | 3   | 3.95        | 2.62        | -5.33       | -2.40       | 1.78        | -1.38      | -1.44       | <b>5.30E-03</b> | <b>T2D</b> |
| rs10512987 | <i>PPP2R3A</i>  | 3   | -4.07       | -2.43       | -0.09       | -3.85       | 2.50        | -4.20      | 2.36        | <b>3.73E-03</b> | <b>LDL</b> |
| rs7356185  | <i>USP53</i>    | 4   | 3.80        | -0.49       | -0.10       | 1.19        | -0.68       | -0.18      | 0.24        | <b>4.18E-03</b> | <b>SBP</b> |
| rs1508798  | <i>SNORD123</i> | 5   | 4.24        | 0.51        | 0.01        | -1.15       | 2.95        | -4.55      | -0.83       | <b>2.34E-03</b> | <b>TG</b>  |
| rs10477741 | <i>C5orf56</i>  | 5   | -4.75       | -0.26       | -1.88       | -4.25       | 1.49        | -0.25      | -0.58       | <b>1.03E-03</b> | <b>LDL</b> |
| rs2814982  | <i>C6orf106</i> | 6   | -4.47       | -2.16       | 0.45        | 4.44        | 6.75        | -0.94      | -1.21       | <b>5.20E-04</b> | <b>LDL</b> |
| rs1321309  | <i>CDKN1A</i>   | 6   | -4.60       | -0.31       | -1.65       | -1.84       | 1.11        | -4.56      | -1.81       | <b>1.86E-03</b> | <b>TG</b>  |
| rs6905288  | <i>VEGFA</i>    | 6   | -4.52       | 1.24        | -2.53       | 1.05        | 6.61        | -7.61      | -0.44       | <b>2.56E-03</b> | <b>HDL</b> |
| rs1564348  | <i>SLC22A1</i>  | 6   | -4.23       | 0.56        | 1.31        | -9.62       | 1.67        | -3.64      | 1.77        | <b>5.66E-03</b> | <b>LDL</b> |
| rs9365233  | <i>MAP3K4</i>   | 6   | 4.57        | -1.97       | 0.23        | 3.78        | -0.32       | 1.32       | -0.04       | <b>5.78E-03</b> | <b>LDL</b> |
| rs2237659  | <i>COG5</i>     | 7   | -4.22       | 1.26        | 1.63        | -3.28       | 1.00        | 3.92       | 1.99        | <b>2.66E-03</b> | <b>TG</b>  |
| rs6997340  | <i>NAT2</i>     | 8   | 4.02        | -0.52       | 1.92        | 4.07        | 0.87        | 6.24       | 1.54        | <b>3.97E-03</b> | <b>LDL</b> |
| rs11204085 | <i>SLC18A1</i>  | 8   | 5.23        | 0.31        | 1.80        | -0.19       | -14.03      | 14.24      | 0.78        | <b>9.24E-04</b> | <b>HDL</b> |
| rs343494   | <i>RANBP6</i>   | 9   | 3.53        | -0.05       | 0.73        | -0.05       | -1.26       | -0.15      | -0.38       | <b>5.94E-03</b> | <b>T1D</b> |
| rs7902355  | <i>TSPAN14</i>  | 10  | 4.24        | 0.63        | -0.41       | 2.21        | 3.58        | -0.45      | 0.40        | <b>5.80E-03</b> | <b>HDL</b> |
| rs7926335  | <i>PLEKHA7</i>  | 11  | -4.25       | 0.84        | -0.78       | -0.76       | -1.54       | -0.29      | 0.40        | <b>7.17E-04</b> | <b>SBP</b> |

|            |                 |    |       |       |       |        |       |       |        |                 |            |
|------------|-----------------|----|-------|-------|-------|--------|-------|-------|--------|-----------------|------------|
| rs12801636 | <i>PCNXL3</i>   | 11 | 4.86  | 1.25  | 2.25  | -1.73  | -5.60 | 4.43  | 3.28   | <b>6.50E-04</b> | <b>HDL</b> |
| rs644740   | <i>OVOL1</i>    | 11 | 3.95  | 0.06  | 1.94  | -3.05  | -4.41 | 2.94  | 1.40   | <b>2.26E-03</b> | <b>SBP</b> |
| rs7933887  | <i>ST3GAL4</i>  | 11 | 4.47  | -0.29 | -0.05 | 2.80   | -3.88 | 2.10  | -0.23  | <b>4.69E-03</b> | <b>HDL</b> |
| rs4149033  | <i>SLCO1B1</i>  | 12 | -3.82 | 1.04  | -0.43 | 1.05   | 0.00  | 3.72  | 0.14   | <b>3.98E-03</b> | <b>TG</b>  |
| rs2681472  | <i>ATP2B1</i>   | 12 | -3.84 | -0.12 | 1.37  | -0.35  | 0.36  | 1.41  | 1.45   | <b>3.40E-03</b> | <b>SBP</b> |
| rs1056618  | <i>AJ276555</i> | 12 | 3.96  | -1.86 | 0.30  | -3.32  | -1.03 | 0.67  | 1.30   | <b>5.78E-03</b> | <b>LDL</b> |
| rs7398833  | <i>CUX2</i>     | 12 | 4.56  | -1.45 | 1.17  | -3.81  | -2.03 | 4.08  | 2.58   | <b>3.25E-03</b> | <b>TG</b>  |
| rs11066320 | <i>PTPN11</i>   | 12 | 5.40  | -3.80 | 0.86  | -6.24  | -5.54 | 2.18  | 0.92   | <b>4.05E-06</b> | <b>T1D</b> |
| rs7315519  | <i>RPH3A</i>    | 12 | 4.34  | -2.76 | -0.91 | -3.71  | -4.36 | -0.17 | 0.18   | <b>4.86E-04</b> | <b>T1D</b> |
| rs692902   | <i>SPPL3</i>    | 12 | 3.65  | 0.27  | 4.76  | 2.24   | 2.91  | 1.02  | -9.03  | <b>4.77E-03</b> | <b>CRP</b> |
| rs2708081  | <i>OASL</i>     | 12 | 5.12  | 1.28  | 3.35  | 4.38   | 1.97  | 1.03  | -12.98 | <b>3.41E-05</b> | <b>CRP</b> |
| rs825461   | <i>ZNF664</i>   | 12 | -4.44 | 1.84  | -4.49 | -0.71  | 6.37  | -2.68 | -0.35  | <b>4.29E-03</b> | <b>T2D</b> |
| rs11057830 | <i>SCARB1</i>   | 12 | -5.26 | 1.02  | 0.52  | -4.52  | 3.48  | -4.15 | -0.54  | <b>3.49E-04</b> | <b>LDL</b> |
| rs4932370  | <i>FURIN</i>    | 15 | -5.69 | 0.75  | -2.47 | 1.31   | -1.90 | 1.50  | 1.53   | <b>7.93E-05</b> | <b>SBP</b> |
| rs2072142  | <i>DHX38</i>    | 16 | -4.27 | -3.22 | -1.17 | -4.90  | -0.87 | -1.14 | -0.06  | <b>1.93E-03</b> | <b>LDL</b> |
| rs9927309  | <i>CTRB2</i>    | 16 | 4.18  | -1.17 | 5.20  | 0.62   | -1.76 | 0.12  | -0.14  | <b>5.30E-03</b> | <b>T2D</b> |
| rs1838105  | <i>GOSR2</i>    | 17 | 3.96  | -1.40 | 0.48  | 2.63   | 4.19  | 1.56  | 0.08   | <b>5.97E-03</b> | <b>HDL</b> |
| rs12940887 | <i>ZNF652</i>   | 17 | -3.73 | -1.55 | 0.61  | -1.16  | 2.83  | -5.09 | -0.54  | <b>5.15E-03</b> | <b>SBP</b> |
| rs2812     | <i>PECAM1</i>   | 17 | -4.48 | 1.27  | 0.57  | 1.00   | -2.24 | -0.79 | 1.54   | <b>3.63E-03</b> | <b>SBP</b> |
| rs13465    | <i>ILF3</i>     | 19 | -4.74 | 0.57  | 0.44  | -12.12 | 2.41  | -0.95 | 0.34   | <b>1.62E-03</b> | <b>LDL</b> |
| rs12052058 | <i>SMARCA4</i>  | 19 | 6.42  | -1.52 | -1.21 | 17.44  | -1.10 | 0.10  | 1.85   | <b>7.34E-06</b> | <b>LDL</b> |
| rs892115   | <i>SPC24</i>    | 19 | 4.11  | -1.18 | 0.91  | 6.60   | -0.77 | 0.42  | 1.65   | <b>4.75E-03</b> | <b>LDL</b> |
| rs17616661 | <i>KANK2</i>    | 19 | -4.56 | -0.95 | -0.62 | -4.14  | 4.41  | -2.16 | -1.96  | <b>1.55E-03</b> | <b>HDL</b> |
| rs2241718  | <i>CYP2F1</i>   | 19 | 4.15  | 0.12  | 0.88  | -3.48  | 0.18  | -1.16 | 0.38   | <b>2.99E-03</b> | <b>LDL</b> |
| rs1415771  | <i>EDEM2</i>    | 20 | -4.22 | -1.52 | -0.62 | 2.54   | 4.03  | 0.12  | 0.06   | <b>4.25E-03</b> | <b>HDL</b> |
| rs3827066  | <i>ZNF335</i>   | 20 | -4.35 | -0.74 | -0.22 | 1.77   | -4.33 | 3.32  | -1.82  | <b>1.55E-03</b> | <b>HDL</b> |
| rs4822458  | <i>DDT</i>      | 22 | 4.21  | -0.70 | -0.30 | 0.46   | 0.26  | 3.85  | -1.08  | <b>5.76E-03</b> | <b>TG</b>  |

Coronary artery disease (CAD), low density lipoprotein (LDL) cholesterol, high density lipoprotein (HDL) cholesterol, triglycerides (TG), type 2 diabetes (T2D), C-reactive protein (CRP), body mass index (BMI), systolic blood pressure (SBP), type 1 diabetes (T1D), chromosome number (Chr).

Note that signed z-scores for T1D and SBP are not publically available and are therefore excluded from this table. The most significant phenotype association per gene is shown (min conjFDR).

**Online Table VI.** Ingenuity Pathway Analysis (IPA) including our novel CAD SNPs and previously published CAD SNPs.

| <b><i>Top Canonical Pathways</i></b>                                  |                     |                         |
|-----------------------------------------------------------------------|---------------------|-------------------------|
| <b>Name</b>                                                           | <b>p-value</b>      |                         |
| LXR/RXR Activation                                                    | 2.22E-14            |                         |
| Atherosclerosis Signaling                                             | 1.36E-11            |                         |
| FXR/RXR Activation                                                    | 3.66E-10            |                         |
| Clathrin-mediated Endocytosis Signaling                               | 2.18E-07            |                         |
| Production of Nitric Oxide and Reactive Oxygen Species in Macrophages | 1.57E-05            |                         |
| <b><i>Diseases and Disorders</i></b>                                  |                     |                         |
| <b>Name</b>                                                           | <b>p-value</b>      | <b>#candidate genes</b> |
| Cardiovascular Disease                                                | 4.24E-14 - 5.02E-04 | 47                      |
| Organismal Injury and Abnormalities                                   | 9.65E-14 - 5.02E-04 | 57                      |
| Metabolic Disease                                                     | 1.80E-12 - 3.71E-04 | 41                      |
| Neurological Disease                                                  | 1.28E-09 - 1.54E-04 | 29                      |
| Psychological Disorders                                               | 1.28E-09 - 1.54E-04 | 26                      |
| <b><i>Molecular and Cellular Functions</i></b>                        |                     |                         |
| <b>Name</b>                                                           | <b>p-value</b>      | <b>#candidate genes</b> |
| Lipid Metabolism                                                      | 5.06E-14 - 3.71E-04 | 40                      |
| Molecular Transport                                                   | 5.06E-14 - 4.12E-04 | 50                      |
| Small Molecule Biochemistry                                           | 5.06E-14 - 3.71E-04 | 51                      |
| Vitamin and Mineral Metabolism                                        | 1.30E-13 - 3.71E-04 | 17                      |
| Protein Synthesis                                                     | 1.41E-13 - 4.45E-05 | 14                      |

\*P-values are from a right-tailed Fisher exact test and represent significance of overrepresentation of candidate genes within respective gene groups. P-value ranges indicate values for various disease sub-classifications (not shown).

**Online Figure I.** Conditional Q-Q plots for BMI, HDL, SBP and TG.

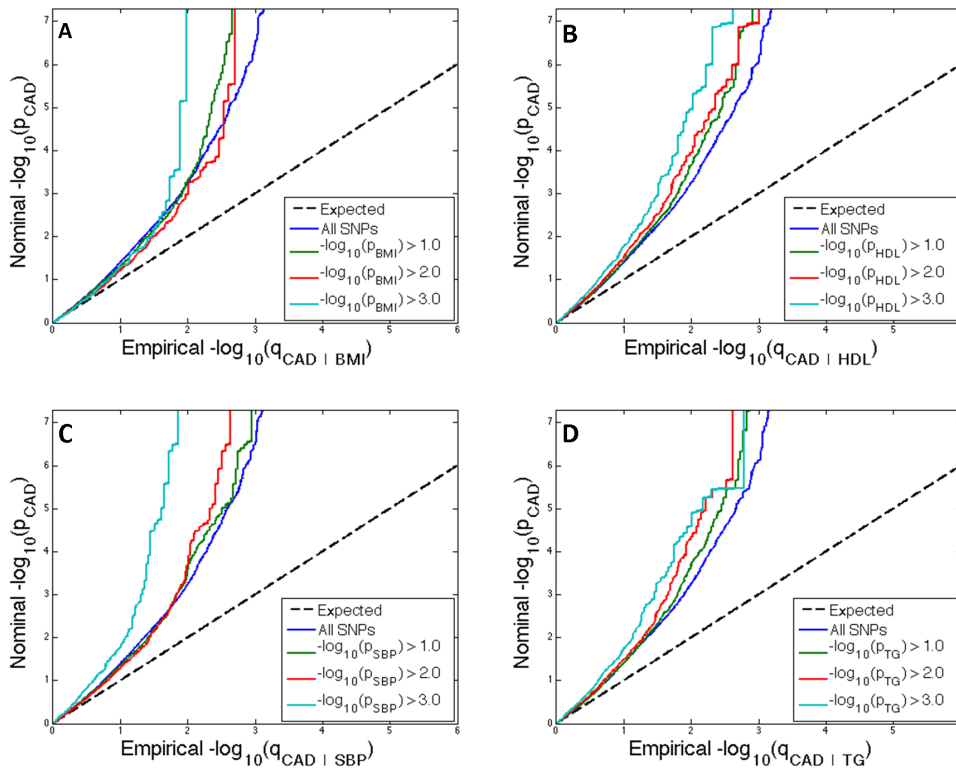

Online Figure II. Stratified replication rates plots

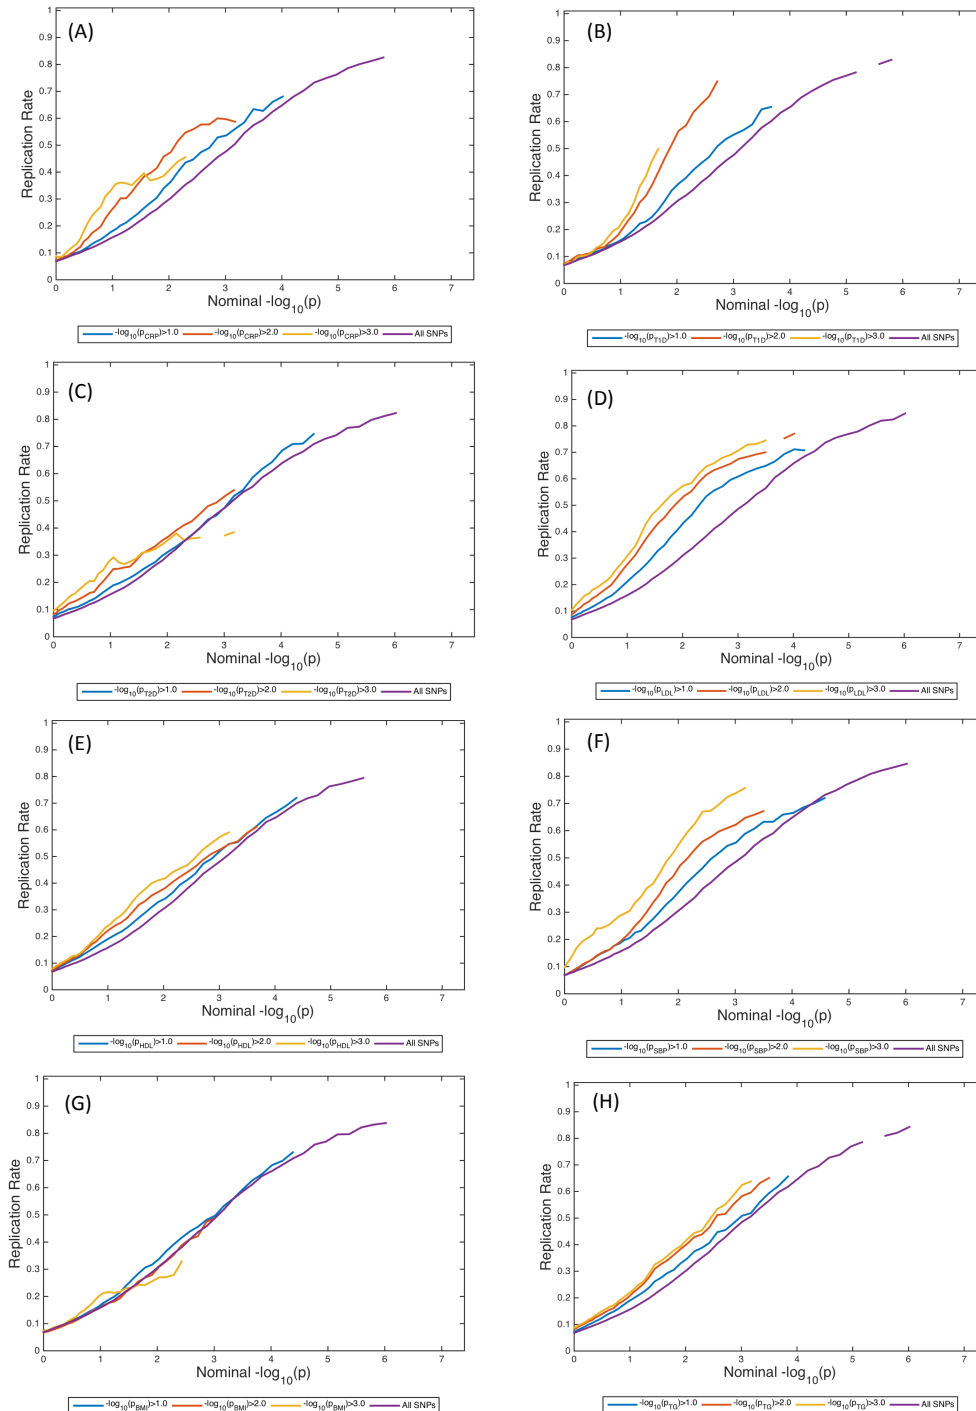



Online Figure III. Conjunctural Manhattan plot

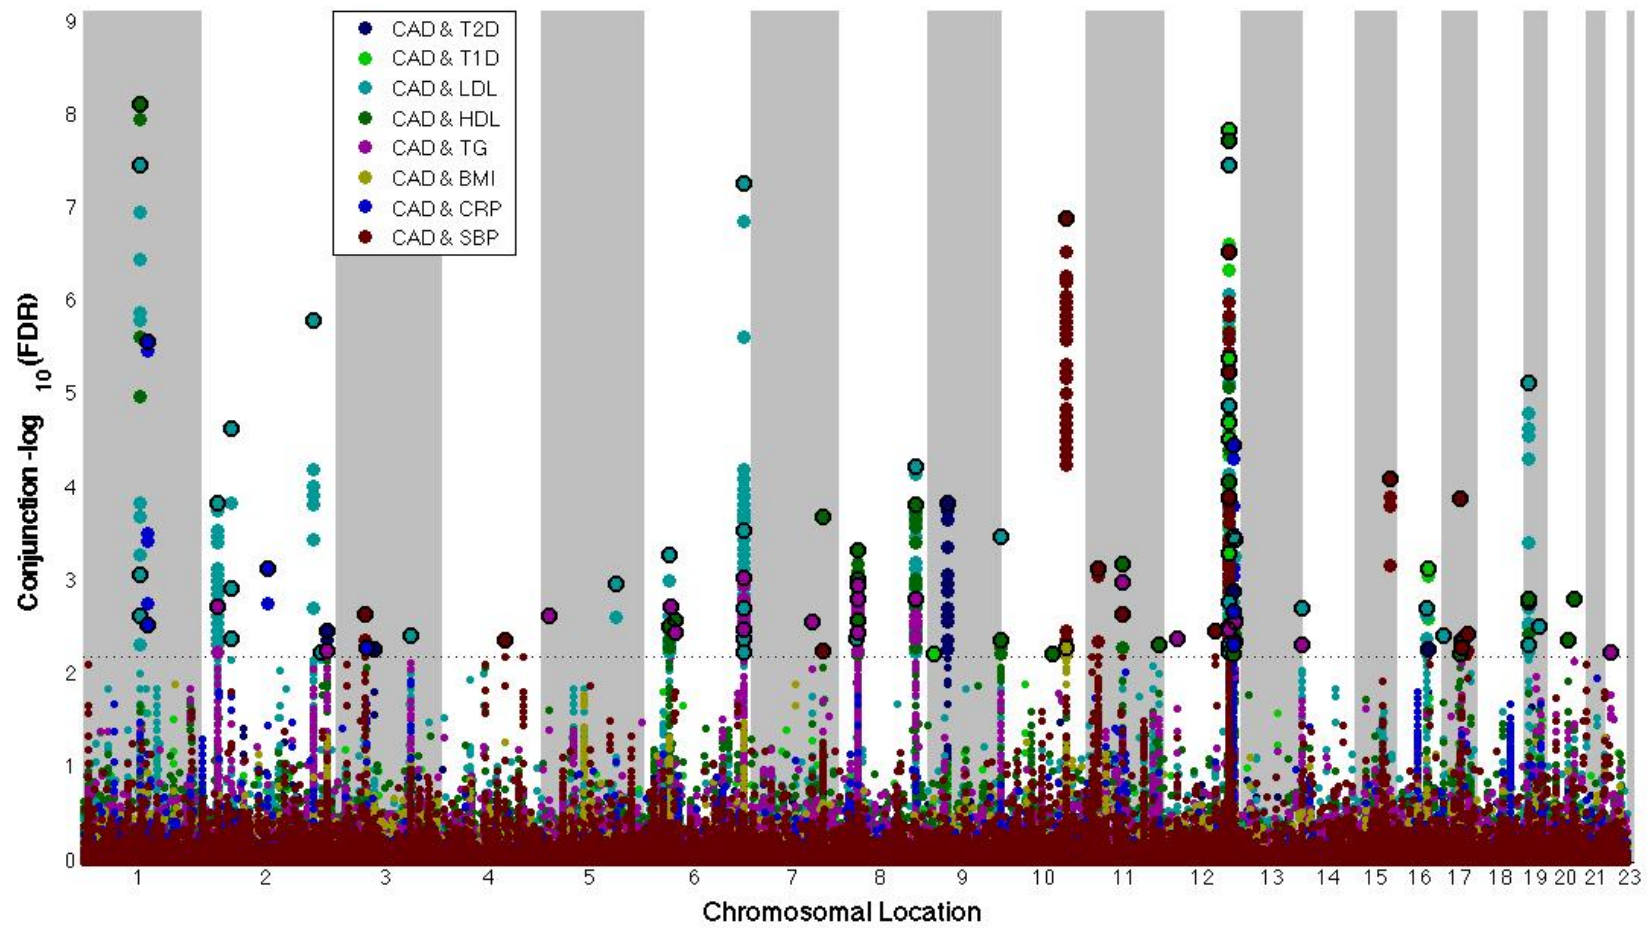

Supplement: NIHMS732221-supplement-306629R2_Online_Data_Supplement.pdf [file NIHMS732221-supplement-306629R2_Online_Data_Supplement.pdf]
